# Supplementary material for: Spatial total RNA sequencing of formalin-fixed paraffin embedded tissue by spRandom-seq
Source: Research Square preprint supplement (doi:10.21203/rs.3.rs-3987790/v1), 2025-09-07
Supplement: Supplementary file 1 [file 929e2ccbd82a99307be97568.xlsx]

## Sheet: Supplementary Table 1
Supplementary Table 1 Bill of materials of home-made instrument
The lift guide mechanism included four compents: linear bearing, guiding axle, guide axle support and elevating motor.
RESOURCE	SOURCE	IDENTIFIER
Camera	DaHeng Imaing Company	Cat# ME2C-231-41GC
Lenses	DaHeng Imaing Company	Cat# XF-MH07X77-1.1C
Light	DaHeng Imaing Company	Cat# C20
Linear bearing	Yiheda Automation Technology Company	Cat# LMK22-d6
Guiding axle	Yiheda Automation Technology Company	Cat# SCJ06-D6-L60-M3-N3
Guide axle support	Yiheda Automation Technology Company	Cat# GAC26-D6
Elevating motor	Shaoteng Technology Company	Cat# ST-802

## Sheet: Supplementary Table 2
Supplementary Table 2 Comparison between spRandom-seq and other methods
Comparison between 10X Visium and spRandom-seq
Source	Sample Type	Mean reads per spot	Sequencing saturation (%)	Valid barcode (%)	Spots under tissue
10X Visium Coronal Brain	Frozen	39640	34.6	97.4	2702
spRandom-seq Coronal Brain	FFPE	39827	59.05	98.07	3360
spRandom-seq Heart	FFPE	39716	53.4	98.7	2831
Source	Total genes detected	Median UMIs per spot	Median genes per spot	Reads Uniquely Mapped to the Genome (%)	Reads Uniquely Mapped to the GeneFull (%)
10X Visium Coronal Brain	17915	11071	2664	74	51.4
spRandom-seq Coronal Brain	31865	4243	1636	47	40
spRandom-seq Heart	32437	5665	1436	52.5	44.6
Comparison between STRS-seq and spRandom-seq
Source	Sample Type	Mean reads per spot	Sequencing saturation (%)	Valid barcode (%)
STRS-seq Heart	Frozen	39783	60.7	97
spRandom-seq Heart	FFPE	39716	53.4	98.7
Source	Spots under tissue	Total genes detected	Median UMIs per spot	Median genes per spot
STRS-seq Heart	2501	21785	11541	3080
spRandom-seq Heart	2831	32437	5665	1436

## Sheet: Supplementary Table 3
Supplementary Table 3 LncRNA&mRNA pair for each niche
Niche	lncRNA	mRNA
Niche 1	C030018K13Rik	Gimd1
Niche 1	C030018K13Rik	Crlf1
Niche 1	C030018K13Rik	Cabp7
Niche 1	C030018K13Rik	Dsp
Niche 1	C030018K13Rik	Ctxnd1
Niche 1	4921539H07Rik	Gm19965
Niche 1	Gm34567	Ctxnd1
Niche 1	C030018K13Rik	Gm19965
Niche 1	Gm34567	Dsp
Niche 1	Gm34567	Gm19965
Niche 1	C030018K13Rik	Zp2
Niche 1	Gm46123	Ctxnd1
Niche 1	4921539H07Rik	Dsp
Niche 1	4921539H07Rik	Rpusd3
Niche 1	Gm46123	Dsp
Niche 1	4921539H07Rik	Ctxnd1
Niche 1	Gm34567	Zp2
Niche 1	Gm46123	Cabp7
Niche 1	C030018K13Rik	Lct
Niche 1	Gm34567	Cabp7
Niche 1	4921539H07Rik	Zp2
Niche 1	4921539H07Rik	Cabp7
Niche 1	Gm46123	Gm19965
Niche 1	C030018K13Rik	Kcng2
Niche 1	4921539H07Rik	Crlf1
Niche 1	4921539H07Rik	Jrk
Niche 1	C030018K13Rik	Rpusd3
Niche 1	Gm34567	Lct
Niche 1	C030018K13Rik	Jrk
Niche 1	4921539H07Rik	Kcng2
Niche 1	Gm46123	Crlf1
Niche 1	4921539H07Rik	Lct
Niche 1	C030018K13Rik	Shisa6
Niche 1	Gm34567	Crlf1
Niche 1	4921539H07Rik	Htr1a
Niche 1	C030018K13Rik	Plk1
Niche 1	C030018K13Rik	Asb16
Niche 1	C030018K13Rik	Oxgr1
Niche 1	Gm34567	Rpusd3
Niche 1	C030018K13Rik	Lcat
Niche 1	C030018K13Rik	Cd38
Niche 1	C030018K13Rik	Tspan18
Niche 1	Gm46123	Zp2
Niche 1	Gm34567	Kcng2
Niche 1	4930477G07Rik	Cabp7
Niche 1	C030018K13Rik	Fibcd1
Niche 1	C030018K13Rik	Calml4
Niche 1	Gm34567	Htr1a
Niche 1	C030018K13Rik	Gpr161
Niche 1	Gm34567	Jrk
Niche 1	4921539H07Rik	Il27ra
Niche 1	4921539H07Rik	Gpr161
Niche 1	Gm34567	Gpr161
Niche 1	Gm46123	Gimd1
Niche 1	ENSMUSG00000120597	Gm19965
Niche 1	4921539H07Rik	Fzd10
Niche 1	4921539H07Rik	Slc26a10
Niche 1	Gm34567	Pcdh20
Niche 1	C030018K13Rik	Zic5
Niche 1	2010320O07Rik	Cabp7
Niche 1	Gm46123	Lct
Niche 1	ENSMUSG00000120597	Cabp7
Niche 1	C030018K13Rik	Or13a22
Niche 1	4921539H07Rik	Pcdh20
Niche 1	ENSMUSG00000120597	Ctxnd1
Niche 1	4921539H07Rik	Kctd4
Niche 1	C030018K13Rik	Htr1a
Niche 1	4930477G07Rik	Zp2
Niche 1	Gm44724	Slc26a10
Niche 1	C030018K13Rik	Kcne2
Niche 1	Gm12339	Gm19965
Niche 1	4921539H07Rik	Bhlhe22
Niche 1	C030018K13Rik	Chrna5
Niche 1	Gm34567	Gimd1
Niche 1	Gm34567	Bhlhe22
Niche 1	C030018K13Rik	Fgf2
Niche 1	Gm46123	Kcng2
Niche 1	4921539H07Rik	Or13a22
Niche 1	ENSMUSG00000120597	Bhlhe22
Niche 1	C030018K13Rik	Cpne6
Niche 1	Gm34567	Slc26a10
Niche 1	C030018K13Rik	Fzd10
Niche 1	4921539H07Rik	Gimd1
Niche 1	C030018K13Rik	Matn2
Niche 1	C030018K13Rik	Il27ra
Niche 1	4921539H07Rik	Cd38
Niche 1	Gm46123	Rpusd3
Niche 1	C030018K13Rik	Il16
Niche 1	Gm48265	Slc26a10
Niche 1	Gm12339	Dsp
Niche 1	4921539H07Rik	Cpne6
Niche 1	4921539H07Rik	Limd2
Niche 1	C030018K13Rik	Rnf182
Niche 1	Gm46123	Jrk
Niche 1	4921539H07Rik	Cyren
Niche 1	Gm44724	Neurod6
Niche 1	2310002F09Rik	Gm19965
Niche 1	4921539H07Rik	Rnf182
Niche 1	Gm34567	Cyren
Niche 1	C030018K13Rik	Epha7
Niche 1	Gm34567	Olfml2b
Niche 1	Gm47728	Gm19965
Niche 1	C030018K13Rik	Plin4
Niche 1	Gm34567	Rnf182
Niche 1	4921539H07Rik	Smarcd2
Niche 1	Gm46123	Gpr161
Niche 1	C030018K13Rik	Zbtb20
Niche 1	4921539H07Rik	Doc2b
Niche 1	2010320O07Rik	Zp2
Niche 1	4921539H07Rik	Lmo1
Niche 1	Gm34567	Kctd4
Niche 1	4921539H07Rik	Cd2
Niche 1	4921539H07Rik	Iigp1
Niche 1	C030018K13Rik	Kctd4
Niche 1	4921539H07Rik	Zfp963
Niche 1	Gm34567	Matn2
Niche 1	4921539H07Rik	Plk1
Niche 1	4921539H07Rik	Pou3f1
Niche 1	C030018K13Rik	Scn3b
Niche 1	ENSMUSG00000120597	Zp2
Niche 1	C030018K13Rik	Olfml2b
Niche 1	4921539H07Rik	Asb16
Niche 1	4930578M01Rik	Gm19965
Niche 1	Gm12339	Ctxnd1
Niche 1	4921539H07Rik	C1ql2
Niche 1	C030018K13Rik	Bhlhe22
Niche 1	2010320O07Rik	Ctxnd1
Niche 1	Gm44724	Pcdh20
Niche 1	4921539H07Rik	Chrna5
Niche 1	C030018K13Rik	Pcdh20
Niche 1	Gm34567	Cd38
Niche 1	Gm34567	Chrna5
Niche 1	9830166K06Rik	Ctxnd1
Niche 1	Gm46123	Htr1a
Niche 1	Gm34567	Pou3f1
Niche 1	Gm49166	Gm19965
Niche 1	Gm34567	Cpne6
Niche 1	Gm12339	Bhlhe22
Niche 1	Gm12339	Slc26a10
Niche 1	C030018K13Rik	Homer3
Niche 1	4921539H07Rik	Dnmt3b
Niche 1	Gm12339	Zp2
Niche 1	Gm34567	Plk1
Niche 1	Gm44724	Bhlhe22
Niche 1	C030018K13Rik	Pcolce
Niche 1	4921539H07Rik	Cldn34a
Niche 1	C030018K13Rik	Cacna1h
Niche 1	ENSMUSG00000120597	Crlf1
Niche 1	Gm34567	Fzd10
Niche 1	Gm12339	Pcdh20
Niche 1	4921539H07Rik	Olfml2b
Niche 1	C030018K13Rik	Limd2
Niche 1	C030018K13Rik	Msx1
Niche 1	2010320O07Rik	Crlf1
Niche 1	4921539H07Rik	Matn2
Niche 1	Gm34567	Smarcd2
Niche 1	ENSMUSG00000120597	Pcdh20
Niche 1	C030018K13Rik	Iqgap2
Niche 1	C030018K13Rik	Pou3f1
Niche 1	Gm49166	Cabp7
Niche 1	Gm49166	Ctxnd1
Niche 1	Gm34567	Tspan18
Niche 1	C030018K13Rik	Slc26a10
Niche 1	Gm12339	Cabp7
Niche 1	4921539H07Rik	Scn3b
Niche 1	2010320O07Rik	Gm19965
Niche 1	4930447M23Rik	Gimd1
Niche 1	ENSMUSG00000120597	Neurod6
Niche 1	Gm46123	Shisa6
Niche 1	C030018K13Rik	Lmo1
Niche 1	Gm34567	Scn3b
Niche 1	Gm34567	Fibcd1
Niche 1	Gm13562	Zp2
Niche 1	C030018K13Rik	Doc2b
Niche 1	C030018K13Rik	Cd2
Niche 1	C030018K13Rik	Galnt17
Niche 1	ENSMUSG00000120597	Hpca
Niche 1	Gm34567	Dnmt3b
Niche 1	Gm48265	Neurod6
Niche 1	4921539H07Rik	Fibcd1
Niche 1	C030018K13Rik	C87436
Niche 1	Gm12339	Lct
Niche 1	Gm44724	Hpca
Niche 1	4921539H07Rik	Fgf2
Niche 1	Gm34567	Asb16
Niche 1	Gm46123	Cd38
Niche 1	2010320O07Rik	Dsp
Niche 1	ENSMUSG00000120597	Cpne6
Niche 1	C030018K13Rik	Glis3
Niche 1	4921539H07Rik	Il16
Niche 1	ENSMUSG00000120597	Iqgap2
Niche 1	C030018K13Rik	Trpc5
Niche 1	4921539H07Rik	Cacna1h
Niche 1	Gm34567	Shisa6
Niche 1	4921539H07Rik	Tspan18
Niche 1	4921539H07Rik	Serpina3n
Niche 1	9330133O14Rik	Cabp7
Niche 1	Gm34567	C1ql2
Niche 1	C030018K13Rik	Sncg
Niche 1	4921539H07Rik	Sowaha
Niche 1	Gm34567	Il16
Niche 1	Gm46123	Tspan18
Niche 1	Gm48265	Pcdh20
Niche 1	ENSMUSG00000120597	Slc26a10
Niche 1	Gm34567	Sowaha
Niche 1	C030018K13Rik	Maml2
Niche 1	C030018K13Rik	Pkp2
Niche 1	Gm34567	Iqgap2
Niche 1	Gm34567	Cd2
Niche 1	Gm34567	Lmo1
Niche 1	Gm46123	Pcdh20
Niche 1	Gm34567	Golm1
Niche 1	ENSMUSG00000120597	Olfml2b
Niche 1	4921539H07Rik	Golm1
Niche 1	5830408C22Rik	Slc26a10
Niche 1	F730043M19Rik	Cabp7
Niche 1	Gm34567	Il27ra
Niche 1	Gm46123	Plk1
Niche 1	4930578M01Rik	Ctxnd1
Niche 1	4921539H07Rik	Bcl6
Niche 1	9830166K06Rik	Gm19965
Niche 1	4921539H07Rik	Rogdi
Niche 1	4921539H07Rik	Neurod6
Niche 1	C030018K13Rik	Kl
Niche 1	Gm46123	Fibcd1
Niche 1	2310002F09Rik	Dsp
Niche 1	Gm34567	Doc2b
Niche 1	4921539H07Rik	Meiosin
Niche 1	4921539H07Rik	Homer3
Niche 1	Gm46123	Matn2
Niche 1	Gm34567	Or13a22
Niche 1	Gm46123	Bhlhe22
Niche 1	2310002F09Rik	Slc26a10
Niche 1	4921539H07Rik	Ube2g2
Niche 1	C030018K13Rik	Hpca
Niche 1	9830166K06Rik	Dsp
Niche 1	Gm34567	Limd2
Niche 1	C030018K13Rik	Lhx9
Niche 1	Gm12339	Crlf1
Niche 1	C030018K13Rik	Nr3c2
Niche 1	Gm48265	Cldn34a
Niche 1	C030018K13Rik	Slit1
Niche 1	Gm46123	Cpne6
Niche 1	Gm46123	Chrna5
Niche 1	Gm46123	Asb16
Niche 1	ENSMUSG00000120597	Pou3f1
Niche 1	4921539H07Rik	Fgf16
Niche 1	4921539H07Rik	Fkbp10
Niche 1	4921539H07Rik	Slc29a4
Niche 1	C030018K13Rik	Sowaha
Niche 1	Gm20754	Gm19965
Niche 1	C030018K13Rik	Npy2r
Niche 1	Gm13562	Cabp7
Niche 1	4930578M01Rik	Dsp
Niche 1	Gm46123	Rnf182
Niche 1	C030018K13Rik	Neurod6
Niche 1	Gm34567	Cacna1h
Niche 1	Gm12339	Neurod6
Niche 1	C030018K13Rik	Iigp1
Niche 1	Gm48265	Hpca
Niche 1	Gm34567	Bcl6
Niche 1	Gm46123	Olfml2b
Niche 1	Gm49166	Crlf1
Niche 1	Gm12339	Cpne6
Niche 1	C030018K13Rik	Cyren
Niche 1	9830166K06Rik	Cabp7
Niche 1	ENSMUSG00000120597	Gpr161
Niche 1	Gm47728	Ctxnd1
Niche 1	C030018K13Rik	Tanc1
Niche 1	Gm12339	Kcng2
Niche 1	2310002F09Rik	Ctxnd1
Niche 1	2310002F09Rik	Pcdh20
Niche 1	4930447M23Rik	Cabp7
Niche 1	F730043M19Rik	Gm19965
Niche 1	4930477G07Rik	Dsp
Niche 1	Gm46123	Kctd4
Niche 1	C030018K13Rik	Cachd1
Niche 1	4921539H07Rik	Crym
Niche 1	ENSMUSG00000120597	Cyren
Niche 1	ENSMUSG00000120597	Dsp
Niche 1	Gm44724	Gm19965
Niche 1	ENSMUSG00000120597	Lct
Niche 1	4921539H07Rik	Or13p8
Niche 1	ENSMUSG00000120597	Kcng2
Niche 1	Gm47728	Cpne6
Niche 1	C030018K13Rik	Slc9a2
Niche 1	C030018K13Rik	Or13p8
Niche 1	C030018K13Rik	Cldn34a
Niche 1	Gm34567	Neurod6
Niche 1	4921539H07Rik	Traip
Niche 1	C030018K13Rik	Zfp963
Niche 1	C030018K13Rik	Stac
Niche 1	2010320O07Rik	Lct
Niche 1	Gm50284	Gm19965
Niche 1	4921539H07Rik	Npy2r
Niche 1	4921539H07Rik	A430005L14Rik
Niche 1	Gm34567	Trpc5
Niche 1	Gm46123	Slc26a10
Niche 1	Gm44724	Crym
Niche 1	C030018K13Rik	Cotl1
Niche 1	4921539H07Rik	Sertm1
Niche 1	ENSMUSG00000120597	Sowaha
Niche 1	C030018K13Rik	Aebp1
Niche 1	Gm34567	Epha7
Niche 1	C030018K13Rik	Chst9
Niche 1	C030018K13Rik	Smarcd2
Niche 1	C030018K13Rik	Cdh9
Niche 1	C030018K13Rik	Dpf3
Niche 1	Gm34567	Slc29a4
Niche 1	ENSMUSG00000120597	Golm1
Niche 1	C030018K13Rik	Meiosin
Niche 1	Gm46123	Epha7
Niche 1	Gm2164	Gm19965
Niche 1	Gm44724	Lpl
Niche 1	C030018K13Rik	Or8g28
Niche 1	4930477G07Rik	Crlf1
Niche 1	C030018K13Rik	Rogdi
Niche 1	C030018K13Rik	Il1r1
Niche 1	Gm34567	Fgf2
Niche 1	ENSMUSG00000120597	Htr1a
Niche 1	C030018K13Rik	Bcl6
Niche 1	2010320O07Rik	Bhlhe22
Niche 1	Gm46123	Scn3b
Niche 1	9330133O14Rik	Ctxnd1
Niche 1	C030018K13Rik	Arhgap12
Niche 1	4921539H07Rik	Pkp2
Niche 1	Gm46123	Il16
Niche 1	Gm47728	Bhlhe22
Niche 1	2010320O07Rik	Gimd1
Niche 1	Gm34567	Slit1
Niche 1	9830166K06Rik	Zp2
Niche 1	Gm46123	Pou3f1
Niche 1	C030018K13Rik	Golm1
Niche 1	Gm46123	Or13a22
Niche 1	Gm46123	Iqgap2
Niche 1	4921539H07Rik	Zdhhc23
Niche 1	C030018K13Rik	Rad51
Niche 1	C030018K13Rik	Sipa1l3
Niche 1	C030018K13Rik	Smoc2
Niche 1	C030018K13Rik	Epha6
Niche 1	Gm34567	Homer3
Niche 1	2310002F09Rik	Bhlhe22
Niche 1	5830408C22Rik	Cldn34a
Niche 1	Gm34567	Cldn34a
Niche 1	4930447M23Rik	Ctxnd1
Niche 1	Gm6999	Gm19965
Niche 1	Gm47728	Pcdh20
Niche 1	Gm44724	Cldn34a
Niche 1	C030018K13Rik	Sh3bp5
Niche 1	C030018K13Rik	Plekha2
Niche 1	4930447M23Rik	Crlf1
Niche 1	Gm34567	Zfp963
Niche 1	F730043M19Rik	Ctxnd1
Niche 1	ENSMUSG00000120597	Crym
Niche 1	4921539H07Rik	Cotl1
Niche 1	Gm47728	Neurod6
Niche 1	Gm12339	Gpr161
Niche 1	Gm44724	Neurod2
Niche 1	Gm34567	Iigp1
Niche 1	Gm13417	Neurod6
Niche 1	Gm34567	Hpca
Niche 1	Gm26652	Gm19965
Niche 1	Gm12339	Pou3f1
Niche 1	4921539H07Rik	Lpl
Niche 1	9330133O14Rik	Crlf1
Niche 1	4921539H07Rik	Lonrf3
Niche 1	Gm42744	Ctxnd1
Niche 1	Gm48265	Bhlhe22
Niche 1	Gm34567	Chst9
Niche 1	Gm46123	Fzd10
Niche 1	C030018K13Rik	Raver2
Niche 1	Gm2164	Cabp7
Niche 1	4921539H07Rik	Orai2
Niche 1	C030018K13Rik	Nr4a3
Niche 1	Gm2164	Dsp
Niche 1	4930578M01Rik	Pcdh20
Niche 1	2310002F09Rik	Kcng2
Niche 1	Gm47728	Slc26a10
Niche 1	2310002F09Rik	Zp2
Niche 1	Gm26652	Ctxnd1
Niche 1	C030018K13Rik	Cacng8
Niche 1	4921539H07Rik	Smoc2
Niche 1	Gm13417	C1ql2
Niche 1	4921539H07Rik	C87436
Niche 1	Gm34567	Traip
Niche 1	Gm34567	Pkp2
Niche 1	C030018K13Rik	Mndal
Niche 1	C030018K13Rik	Pip5k1b
Niche 1	C030018K13Rik	Crym
Niche 1	Gm12339	Jrk
Niche 1	Gm12339	Cyren
Niche 1	Gm16263	Gm19965
Niche 1	9330133O14Rik	Dsp
Niche 1	Gm34567	Zdhhc23
Niche 1	4921539H07Rik	Zic5
Niche 1	4930578M01Rik	Slc26a10
Niche 1	Gm2164	Crlf1
Niche 1	Gm46123	Cyren
Niche 1	Gm12339	Limd2
Niche 1	Gm44724	Epha7
Niche 1	Gm34567	Npy2r
Niche 1	Gm12339	Golm1
Niche 1	ENSMUSG00000120597	Gimd1
Niche 1	BC055402	Ctxnd1
Niche 1	Gm44724	Cpne6
Niche 1	Gm34567	Plekha2
Niche 1	C030018K13Rik	Trpc4
Niche 1	Gm12339	Htr1a
Niche 1	Gm46123	Fgf2
Niche 1	C030018K13Rik	Ccbe1
Niche 1	C030018K13Rik	Lonrf3
Niche 1	Gm34567	Sh3bp5
Niche 1	4930578M01Rik	Kcng2
Niche 1	4921539H07Rik	Plekha2
Niche 1	C030018K13Rik	Slc29a4
Niche 1	Gm46123	Cacna1h
Niche 1	Gm46123	Il27ra
Niche 1	Gm34567	Smoc2
Niche 1	Gm13417	Hpca
Niche 1	Gm26652	Zp2
Niche 1	C030018K13Rik	Gstm7
Niche 1	4921539H07Rik	Cnih2
Niche 1	Gm42744	Dsp
Niche 1	Gm47728	Hpca
Niche 1	C030018K13Rik	Prox1
Niche 1	2010320O07Rik	Pcdh20
Niche 1	Gm48265	Gm19965
Niche 1	BC055402	Dsp
Niche 1	Gm34567	Gabra5
Niche 1	2310002F09Rik	Lct
Niche 1	C030018K13Rik	Orai2
Niche 1	9830166K06Rik	Crlf1
Niche 1	9330133O14Rik	Zp2
Niche 1	Gm46123	Limd2
Niche 1	Gm26652	Cabp7
Niche 1	Gm13417	Slc26a10
Niche 1	Gm34567	Sertm1
Niche 1	4921539H07Rik	Trpc5
Niche 1	C030018K13Rik	Serpina3n
Niche 1	C030018K13Rik	Nrp1
Niche 1	Gm2164	Zp2
Niche 1	C030018K13Rik	Stum
Niche 1	Gm46123	Doc2b
Niche 1	4921539H07Rik	Cfap100
Niche 1	4921539H07Rik	Chst9
Niche 1	9330133O14Rik	Gm19965
Niche 1	Gm12339	Hpca
Niche 1	Gm12339	Crym
Niche 1	2010320O07Rik	Olfml2b
Niche 1	Gm48265	Epha7
Niche 1	Gm34567	Rogdi
Niche 1	4921539H07Rik	Rgs14
Niche 1	Gm12339	Cldn34a
Niche 1	C030018K13Rik	Arpc5
Niche 1	4930447M23Rik	Dsp
Niche 1	Gm46123	Cd2
Niche 1	2310002F09Rik	Jrk
Niche 1	4921539H07Rik	Arpc5
Niche 1	4921539H07Rik	Dhx33
Niche 1	F730043M19Rik	Crlf1
Niche 1	Gm44724	Dsp
Niche 1	4930578M01Rik	Cpne6
Niche 1	C030018K13Rik	Col11a1
Niche 1	C030018K13Rik	Traip
Niche 1	2310002F09Rik	Htr1a
Niche 1	ENSMUSG00000120597	Cdh9
Niche 1	Gm12339	Scn3b
Niche 1	4921539H07Rik	Erich5
Niche 1	Gm46123	Lmo1
Niche 1	C030018K13Rik	A430005L14Rik
Niche 1	C030018K13Rik	Lpl
Niche 1	Gm34567	Orai2
Niche 1	2310002F09Rik	Fzd10
Niche 1	4921539H07Rik	Lingo3
Niche 1	ENSMUSG00000120597	Lpl
Niche 1	Gm34567	Ube2g2
Niche 1	4930578M01Rik	Bhlhe22
Niche 1	Gm34567	Sipa1l3
Niche 1	Gm50328	Gm19965
Niche 1	Gm34567	Meiosin
Niche 1	4921539H07Rik	Foxn1
Niche 1	C030018K13Rik	Ube2g2
Niche 1	Gm46123	Trpc5
Niche 1	Gm34567	Cnih2
Niche 1	Gm12339	Sowaha
Niche 1	Gm12339	Olfml2b
Niche 1	Gm34567	Cdh9
Niche 1	C030018K13Rik	Cecr2
Niche 1	C030018K13Rik	Kynu
Niche 1	4921539H07Rik	Tnfaip8l3
Niche 1	ENSMUSG00000120597	Matn2
Niche 1	2310002F09Rik	Cpne6
Niche 1	C030018K13Rik	Hectd2
Niche 1	4921539H07Rik	Gabra5
Niche 1	Gm16263	Bhlhe22
Niche 1	Gm44724	Golm1
Niche 1	Gm46123	Sowaha
Niche 1	Gm13417	Gm19965
Niche 1	Gm13417	Pcdh20
Niche 1	C030018K13Rik	Htr4
Niche 1	4921539H07Rik	Sh3bp5
Niche 1	C030018K13Rik	Dnmt3b
Niche 1	4921539H07Rik	Prdm8
Niche 1	9830166K06Rik	Lct
Niche 1	Gm48265	Lpl
Niche 1	Gm48265	Cpne6
Niche 1	C030018K13Rik	Foxn1
Niche 1	Gm46123	Smarcd2
Niche 1	Gm34567	Serpina3n
Niche 1	4921539H07Rik	Ccdc71l
Niche 1	4921539H07Rik	Dbh
Niche 1	Gm47728	Htr1a
Niche 1	C030018K13Rik	St6galnac5
Niche 1	2310002F09Rik	Cabp7
Niche 1	Gm47728	Kctd4
Niche 1	C030018K13Rik	Sertm1
Niche 1	Gm46123	Homer3
Niche 1	C030018K13Rik	Lamb1
Niche 1	Gm34567	Trpc4
Niche 1	Gm47728	Kcng2
Niche 1	Gm34567	Cacng8
Niche 1	ENSMUSG00000120597	Fibcd1
Niche 1	Gm6999	Bhlhe22
Niche 1	Gm34567	Dpf3
Niche 1	4921539H07Rik	Pcdh8
Niche 1	BC055402	Gm19965
Niche 1	ENSMUSG00000120597	Limd2
Niche 1	Gm44724	Itpka
Niche 1	4921539H07Rik	Ccbe1
Niche 1	Gm34567	Crym
Niche 1	4921539H07Rik	Cecr2
Niche 1	Gm50284	Ctxnd1
Niche 1	4930477G07Rik	Lct
Niche 1	C030018K13Rik	Gabra5
Niche 1	4921539H07Rik	Slit1
Niche 1	Gm13562	Dsp
Niche 1	Gm6999	Ctxnd1
Niche 1	Gm34567	Pip5k1b
Niche 1	Gm12339	Iqgap2
Niche 1	Gm34567	Hectd2
Niche 1	C030018K13Rik	Tgfb2
Niche 1	Gm2164	Ctxnd1
Niche 1	4921539H07Rik	Yipf2
Niche 1	Gm12339	Matn2
Niche 1	4921539H07Rik	Rad51
Niche 1	Gm46123	Slit1
Niche 1	Gm46123	Zbtb20
Niche 1	Gm6999	Pcdh20
Niche 1	Gm34567	C87436
Niche 1	Gm46123	Hpca
Niche 1	Gm12339	Lpl
Niche 1	Gm26652	Dsp
Niche 1	Gm44724	Ctxnd1
Niche 1	2010320O07Rik	Slc26a10
Niche 1	Gm48265	Crym
Niche 1	C030018K13Rik	Slc37a2
Niche 1	Gm34567	Ccbe1
Niche 1	C030018K13Rik	Fzd5
Niche 1	4921539H07Rik	Cacng8
Niche 1	2310002F09Rik	Gpr161
Niche 1	4930578M01Rik	Zp2
Niche 1	Gm12339	Epha7
Niche 1	4921539H07Rik	Iqgap2
Niche 1	Gm34567	Prdm8
Niche 1	ENSMUSG00000120597	Ddn
Niche 1	C030018K13Rik	Plekhg5
Niche 1	4930477G07Rik	Bhlhe22
Niche 1	C030018K13Rik	Dhx33
Niche 1	ENSMUSG00000120597	Neurod2
Niche 1	2010320O07Rik	Kcng2
Niche 1	Gm12339	Rnf182
Niche 1	4921539H07Rik	Cdh9
Niche 1	Gm46123	Neurod6
Niche 1	C030018K13Rik	Ror1
Niche 1	C030018K13Rik	Lrrn1
Niche 1	ENSMUSG00000120597	Epha7
Niche 1	C030018K13Rik	Tle1
Niche 1	Gm46123	Lcat
Niche 1	4930578M01Rik	Jrk
Niche 1	4921539H07Rik	Plekhg5
Niche 1	Gm44724	Iqgap2
Niche 1	Gm6999	Dsp
Niche 1	C030018K13Rik	Itga8
Niche 1	4930578M01Rik	Htr1a
Niche 1	4930578M01Rik	Lct
Niche 1	Gm34567	Lonrf3
Niche 1	C030018K13Rik	Rfx3
Niche 1	4921539H07Rik	Lsm8
Niche 1	4921539H07Rik	Lurap1l
Niche 1	Gm34567	Col11a1
Niche 1	C030018K13Rik	Rasd1
Niche 1	Gm46123	Golm1
Niche 1	2310002F09Rik	Limd2
Niche 1	4921539H07Rik	Gpc4
Niche 1	Gm34567	Lurap1l
Niche 1	Gm6999	Zp2
Niche 1	Gm47728	Limd2
Niche 1	Gm50284	Pcdh20
Niche 1	4921539H07Rik	Skida1
Niche 1	Gm50284	Slc26a10
Niche 1	Gm44724	Cracdl
Niche 1	Gm34567	Cotl1
Niche 1	4921539H07Rik	Wfs1
Niche 1	4930578M01Rik	Gpr161
Niche 1	Gm34567	Stac
Niche 1	ENSMUSG00000120597	Scn3b
Niche 1	Gm34567	Gpc4
Niche 1	Gm6999	Slc26a10
Niche 1	Gm34567	Arpc5
Niche 1	C030018K13Rik	C1ql2
Niche 1	Gm34567	Lcat
Niche 1	C030018K13Rik	Erich5
Niche 1	Gm34567	Cecr2
Niche 1	Gm34567	Nr3c2
Niche 1	4921539H07Rik	Stac
Niche 1	ENSMUSG00000120597	Sh3bp5
Niche 1	C030018K13Rik	Gpc4
Niche 1	C030018K13Rik	Tnfaip8l3
Niche 1	Gm13417	Cpne6
Niche 1	4930477G07Rik	Gimd1
Niche 1	4921539H07Rik	Slc9a4
Niche 1	Gm47728	Gpr161
Niche 1	Gm34567	Cfap100
Niche 1	4930578M01Rik	Cabp7
Niche 1	Gm13562	Bhlhe22
Niche 1	4921539H07Rik	Lypd1
Niche 1	2310002F09Rik	Cyren
Niche 1	Gm34567	Plekhg5
Niche 1	Gm34567	Zic5
Niche 1	2010320O07Rik	Iqgap2
Niche 1	4921539H07Rik	Nr4a3
Niche 1	Gm34567	Slc9a4
Niche 1	Gm16263	Pcdh20
Niche 1	Gm46123	Nr3c2
Niche 1	2310002F09Rik	Crlf1
Niche 1	C030018K13Rik	Zdhhc23
Niche 1	Gm50328	Ctxnd1
Niche 1	4921539H07Rik	Tnfrsf25
Niche 1	4921539H07Rik	Trpc4
Niche 1	2010320O07Rik	Gpr161
Niche 1	Gm49166	Cpne6
Niche 1	2310002F09Rik	Cldn34a
Niche 1	Gm47728	Iqgap2
Niche 1	4921539H07Rik	Lcat
Niche 1	Gm49166	Kcng2
Niche 1	C030018K13Rik	Garem1
Niche 1	Gm46123	Bcl6
Niche 1	Gm44724	Limd2
Niche 1	C030018K13Rik	Vmn1r78
Niche 1	Gm34567	Dhx33
Niche 1	Gm49166	Zp2
Niche 1	C030018K13Rik	Wipf3
Niche 1	2310002F09Rik	Rnf182
Niche 1	Gm4632	Dsp
Niche 1	4921539H07Rik	Rab26
Niche 1	4930578M01Rik	Scn3b
Niche 1	Gm34567	Itga8
Niche 1	2310002F09Rik	Kctd4
Niche 1	Gm35940	Ctxnd1
Niche 1	2010320O07Rik	Cpne6
Niche 1	Gm34567	Fkbp10
Niche 1	ENSMUSG00000120597	Plekhg5
Niche 1	Gm46123	Galnt17
Niche 1	4921539H07Rik	Chrna3
Niche 1	Gm48265	Limd2
Niche 1	Gm34567	Rad51
Niche 1	4921539H07Rik	Tnxb
Niche 1	4930578M01Rik	Kctd4
Niche 1	C030018K13Rik	Sema5a
Niche 1	4921539H07Rik	Fbxo40
Niche 1	4921539H07Rik	Npnt
Niche 1	Gm47728	Sowaha
Niche 1	Gm9947	Dsp
Niche 1	2010320O07Rik	Fibcd1
Niche 1	ENSMUSG00000120597	Hectd2
Niche 1	4921539H07Rik	Shisa6
Niche 1	C030018K13Rik	Parp1
Niche 1	Gm12339	Or13a22
Niche 1	4921539H07Rik	Dpf3
Niche 1	4921539H07Rik	Hpca
Niche 1	ENSMUSG00000120597	Zdhhc23
Niche 1	Gm13417	Bhlhe22
Niche 1	ENSMUSG00000120597	Il16
Niche 1	Emx2os	Gm19965
Niche 1	Gm34567	Lpl
Niche 1	4921539H07Rik	Hectd2
Niche 1	C030018K13Rik	Ncdn
Niche 1	Gm2164	Gimd1
Niche 1	Gm47728	Crym
Niche 1	BC055402	Pcdh20
Niche 1	ENSMUSG00000120597	Kctd4
Niche 1	Gm34567	Maml2
Niche 1	4921539H07Rik	Syt10
Niche 1	4921539H07Rik	Tgfb2
Niche 1	2310002F09Rik	Rpusd3
Niche 1	Gm50284	Dsp
Niche 1	C030018K13Rik	Epha3
Niche 1	C030018K13Rik	Cfap100
Niche 1	Gm26652	Crlf1
Niche 1	9830166K06Rik	Kcng2
Niche 1	Gm44724	Sowaha
Niche 1	Gm34567	A430005L14Rik
Niche 1	C030018K13Rik	Lypd1
Niche 1	2010320O07Rik	Pou3f1
Niche 1	4921539H07Rik	Col11a1
Niche 1	Gm48265	Neurod2
Niche 1	1700057H15Rik	Gm19965
Niche 1	4930578M01Rik	Limd2
Niche 1	Gm48265	Gpr22
Niche 1	2310002F09Rik	Neurod6
Niche 1	Gm34567	Skida1
Niche 1	Gm48265	Scn3b
Niche 1	Gm50284	Cpne6
Niche 1	ENSMUSG00000120597	Slc29a4
Niche 1	Gm44724	Scn3b
Niche 1	Gm12339	Smarcd2
Niche 1	Gm34567	Tgfb2
Niche 1	Gm46123	Chst9
Niche 1	Gm34567	Tnfaip8l3
Niche 1	Gm46123	Maml2
Niche 1	C030018K13Rik	Ksr1
Niche 1	4921539H07Rik	Zfp189
Niche 1	4921539H07Rik	Tarbp1
Niche 1	4921539H07Rik	Neurod2
Niche 1	ENSMUSG00000120597	Trpc4
Niche 1	Gm44724	Gpr22
Niche 1	Gm46123	Pkp2
Niche 1	Gm46123	Npy2r
Niche 1	Gm47728	Cabp7
Niche 1	Gm34567	Spink8
Niche 1	Gm9947	Ctxnd1
Niche 1	2310002F09Rik	Smarcd2
Niche 1	Gm6999	Cabp7
Niche 1	Gm34567	Npnt
Niche 1	Gm44257	Gm19965
Niche 1	ENSMUSG00000120597	Chrna5
Niche 1	2010320O07Rik	Neurod6
Niche 1	Gm46123	Dnmt3b
Niche 1	Gm34567	Or13p8
Niche 1	Gm12339	Cd38
Niche 1	F730043M19Rik	Gimd1
Niche 1	Gm34567	Cdc40
Niche 1	4921539H07Rik	Rab40b
Niche 1	Gm49166	Gimd1
Niche 1	Emx2os	Dsp
Niche 1	Gm12339	Kctd4
Niche 1	Gm44724	Cyren
Niche 1	Gm12339	Or13p8
Niche 1	4921539H07Rik	Parp1
Niche 1	Gm2164	Rpusd3
Niche 1	Gm46123	Cldn34a
Niche 1	2010320O07Rik	Hpca
Niche 1	ENSMUSG00000120597	Cd38
Niche 1	Gm34567	Erich5
Niche 1	Gm42744	Zp2
Niche 1	C030018K13Rik	Wfs1
Niche 1	Gm34567	Il1r1
Niche 1	Gm34567	Fgf16
Niche 1	Gm46123	Cdh9
Niche 1	Gm34567	Nrp1
Niche 1	Gm34567	Ccdc71l
Niche 1	Gm34567	Pcdh8
Niche 1	Gm46123	C87436
Niche 1	Emx2os	Ctxnd1
Niche 1	Gm34567	Galnt17
Niche 1	2310002F09Rik	Scn3b
Niche 1	Gm34567	Dbh
Niche 1	4930578M01Rik	Neurod6
Niche 1	Gm46123	Iigp1
Niche 1	Gm49172	Slc26a10
Niche 1	D630008O14Rik	Gm19965
Niche 1	Gm20754	Crlf1
Niche 1	Gm47728	Cyren
Niche 1	ENSMUSG00000120597	Cracdl
Niche 1	4933412O06Rik	Cabp7
Niche 1	Gm34567	Rgs14
Niche 1	2310002F09Rik	Pou3f1
Niche 1	Gm47728	Pou3f1
Niche 1	9330133O14Rik	Gimd1
Niche 1	Gm12339	Chrna5
Niche 1	Gm49166	Gpr161
Niche 1	C030018K13Rik	Lurap1l
Niche 1	Gm34567	Glis3
Niche 1	C030018K13Rik	Ahcyl2
Niche 1	C030018K13Rik	Lsm8
Niche 1	9830166K06Rik	Gpr161
Niche 1	Gm35940	Cabp7
Niche 1	4921539H07Rik	Raver2
Niche 1	Gm50284	Bhlhe22
Niche 1	C030018K13Rik	Fat4
Niche 1	Gm46123	Sipa1l3
Niche 1	4921539H07Rik	Lamb1
Niche 1	Gm47728	Lpl
Niche 1	Gm46123	Sh3bp5
Niche 1	Gm9947	Zp2
Niche 1	4921539H07Rik	Foxn2
Niche 1	Gm12339	Shisa6
Niche 1	4930578M01Rik	Epha7
Niche 1	Gm48265	Fzd10
Niche 1	4921539H07Rik	Itga8
Niche 1	2010320O07Rik	Matn2
Niche 1	Gm48265	Cracdl
Niche 1	Gm26652	Lct
Niche 1	Gm46123	Slc29a4
Niche 1	4930578M01Rik	Rnf182
Niche 1	C030018K13Rik	Cdc40
Niche 1	4921539H07Rik	Cdc40
Niche 1	Gm20754	Zp2
Niche 1	Gm34567	Nr4a3
Niche 1	C030018K13Rik	Ptk2b
Niche 1	Gm47728	Dsp
Niche 1	Gm16263	Neurod6
Niche 1	ENSMUSG00000120597	Jrk
Niche 1	4921539H07Rik	Il1r1
Niche 1	4930578M01Rik	Rpusd3
Niche 1	4930578M01Rik	Crlf1
Niche 1	C030018K13Rik	Cyp7b1
Niche 1	Gm46123	Zfp963
Niche 1	Gm44724	Pou3f1
Niche 1	Gm46123	Glis3
Niche 1	2010320O07Rik	Epha7
Niche 1	Gm46123	Smoc2
Niche 1	Gm34567	Stum
Niche 1	Gm4632	Zp2
Niche 1	Gm44724	Zp2
Niche 1	BC055402	Zp2
Niche 1	Gm47728	Zp2
Niche 1	4921539H07Rik	Adra1d
Niche 1	Gm46123	Zic5
Niche 1	4921539H07Rik	Itga4
Niche 1	Gm2164	Lct
Niche 1	C030018K13Rik	Pakap
Niche 1	Gm34567	Fbxo40
Niche 1	Gm34567	Neurod2
Niche 1	Gm34567	Wipf3
Niche 1	9830166K06Rik	Gimd1
Niche 1	C030018K13Rik	Ippk
Niche 1	Gm12339	Gimd1
Niche 1	9330133O14Rik	Lct
Niche 1	Gm12339	Cdh9
Niche 1	C030018K13Rik	Sgms2
Niche 1	C030018K13Rik	Sphkap
Niche 1	Gm46123	Dpf3
Niche 1	Gm44724	Plekhg5
Niche 1	Gm35940	Gm19965
Niche 1	C030018K13Rik	Foxj1
Niche 1	Gm16263	Slc26a10
Niche 1	Gm49678	Dsp
Niche 1	ENSMUSG00000120597	Or13p8
Niche 1	Gm46123	Plekha2
Niche 1	C030018K13Rik	Npr1
Niche 1	C030018K13Rik	Lingo3
Niche 1	2010320O07Rik	Chrna5
Niche 1	Gm44724	Lct
Niche 1	Gm12339	Slc29a4
Niche 1	Gm47728	Scn3b
Niche 1	Gm34567	Plin4
Niche 1	Gm48265	Shisa6
Niche 1	Gm16263	Ctxnd1
Niche 1	Gm12339	Plekhg5
Niche 1	2310002F09Rik	Il27ra
Niche 1	Gm12339	Il16
Niche 1	Gm34567	Arhgef25
Niche 1	Gm49172	Pcdh20
Niche 1	Gm48265	Iqgap2
Niche 1	4921539H07Rik	Vangl2
Niche 1	4921539H07Rik	Epha7
Niche 1	Gm6999	Lct
Niche 1	Gm46123	C1ql2
Niche 1	Gm9947	Cabp7
Niche 1	Gm49678	Rpusd3
Niche 1	Gm46123	Rogdi
Niche 1	Gm34567	Kbtbd11
Niche 1	4930477G07Rik	Olfml2b
Niche 1	F730043M19Rik	Zp2
Niche 1	4930447M23Rik	Gm19965
Niche 1	C030018K13Rik	Synpr
Niche 1	4921539H07Rik	Plin4
Niche 1	Gm34567	Tnxb
Niche 1	4930477G07Rik	Shisa6
Niche 1	Emx2os	Fzd10
Niche 1	9830166K06Rik	Htr1a
Niche 1	Gm34567	Tanc1
Niche 1	Gm34567	Cachd1
Niche 1	4930578M01Rik	Hpca
Niche 1	Gm46123	Meiosin
Niche 1	ENSMUSG00000120597	Prdm8
Niche 1	C030018K13Rik	Tarbp1
Niche 1	Gm34567	Tarbp1
Niche 1	Gm49166	Dsp
Niche 1	4930578M01Rik	Iqgap2
Niche 1	Gm46123	Pip5k1b
Niche 1	Gm34567	Foxn2
Niche 1	Gm12339	Neurod2
Niche 1	Gm12339	Zdhhc23
Niche 1	Gm49678	Gm19965
Niche 1	Gm50284	Epha7
Niche 1	Gm34567	Tle1
Niche 1	Gm34567	Parp1
Niche 1	4930477G07Rik	Epha7
Niche 1	C030018K13Rik	Hunk
Niche 1	Gm20754	Cabp7
Niche 1	C030018K13Rik	Abhd17c
Niche 1	Gm34567	Arhgap12
Niche 1	4921539H07Rik	Sipa1l3
Niche 1	5830408C22Rik	Neurod6
Niche 1	Gm34567	Rab26
Niche 1	9830166K06Rik	Pcdh20
Niche 1	C030018K13Rik	Cald1
Niche 1	C030018K13Rik	Cacnb2
Niche 1	C030018K13Rik	Ntf3
Niche 1	C030018K13Rik	Foxn2
Niche 1	4921539H07Rik	Gpr22
Niche 1	Gm49166	Htr1a
Niche 1	C030018K13Rik	Nkain3
Niche 1	C030018K13Rik	Cnih2
Niche 1	Gm49678	Fzd10
Niche 1	4921539H07Rik	Arhgef25
Niche 1	2010320O07Rik	Htr1a
Niche 1	2010320O07Rik	Golm1
Niche 1	Gm12339	Bcl6
Niche 1	2010320O07Rik	Cyren
Niche 1	ENSMUSG00000120597	Cacna1h
Niche 1	ENSMUSG00000120597	Cacng8
Niche 1	Gm46123	Cacng8
Niche 1	4921539H07Rik	Crls1
Niche 1	4930578M01Rik	Shisa6
Niche 1	Gm13562	Lct
Niche 1	4921539H07Rik	Npr1
Niche 1	Gm34567	Fat4
Niche 1	C030018K13Rik	Gtf2h2
Niche 1	C030018K13Rik	Ccdc71l
Niche 1	Gm46123	Plin4
Niche 1	BC055402	Lct
Niche 1	C030018K13Rik	Bmi1
Niche 1	Gm49172	Bhlhe22
Niche 1	Gm44724	Kcng2
Niche 1	4921539H07Rik	Kbtbd11
Niche 1	2310002F09Rik	Or13a22
Niche 1	Gm46123	Trpc4
Niche 1	ENSMUSG00000120597	Cfap100
Niche 1	ENSMUSG00000120183	Gm19965
Niche 1	Gm50284	Kcng2
Niche 1	Gm12339	Hectd2
Niche 1	2310002F09Rik	Golm1
Niche 1	C030018K13Rik	Col8a2
Niche 1	Gm46123	Traip
Niche 1	2310002F09Rik	Sowaha
Niche 1	C030018K13Rik	Fgf16
Niche 1	Gm4241	Cabp7
Niche 1	C030018K13Rik	Gfra1
Niche 1	Gm44724	Shisa6
Niche 1	Gm13417	Kctd4
Niche 1	Gm34567	Slc9a2
Niche 1	4921539H07Rik	Htr4
Niche 1	Gm50284	Hpca
Niche 1	Gm34567	Cyp7b1
Niche 1	Gm46123	Stac
Niche 1	Gm44724	Icam5
Niche 1	2010320O07Rik	Il16
Niche 1	4930578M01Rik	Pou3f1
Niche 1	C030018K13Rik	Fam167a
Niche 1	C030018K13Rik	Prdm8
Niche 1	Gm12339	Fzd10
Niche 1	Gm34567	Lingo3
Niche 1	Gm14486	Gimd1
Niche 1	Gm34567	Yipf2
Niche 1	Gm34567	Wfs1
Niche 1	Gm47728	Cdh9
Niche 1	C030018K13Rik	Neurod2
Niche 1	Gm4632	Ctxnd1
Niche 1	C030018K13Rik	Npnt
Niche 1	ENSMUSG00000120597	Smoc2
Niche 1	Gm34567	Garem1
Niche 1	Gm44724	Zfp189
Niche 1	D630008O14Rik	Ctxnd1
Niche 1	Gm46123	Cotl1
Niche 1	Gm47728	Golm1
Niche 1	Gm44724	Hectd2
Niche 1	4921539H07Rik	Spink8
Niche 1	C030018K13Rik	Armh4
Niche 1	Gm34567	Itga4
Niche 1	Gm13562	Crlf1
Niche 1	C030018K13Rik	Crls1
Niche 1	ENSMUSG00000120597	Traip
Niche 1	Emx2os	Pcdh20
Niche 1	4921539H07Rik	Abhd17c
Niche 1	Gm35940	Dsp
Niche 1	C030018K13Rik	Arpc2
Niche 1	C030018K13Rik	Kbtbd11
Niche 1	C030018K13Rik	Ust
Niche 1	Gm2164	Jrk
Niche 1	Gm44724	Ddn
Niche 1	C030018K13Rik	Palmd
Niche 1	Gm46123	Orai2
Niche 1	Gm44724	Zbtb18
Niche 1	C030018K13Rik	Ndst4
Niche 1	Gm34567	Lsm8
Niche 1	Gm16263	Hpca
Niche 1	Gm34567	Htr4
Niche 1	4921539H07Rik	Gtf2h2
Niche 1	4930578M01Rik	Cyren
Niche 1	Gm50284	Neurod6
Niche 1	C030018K13Rik	Dgka
Niche 1	Gm34567	Ksr1
Niche 1	Gm46123	Epha6
Niche 1	Gm34567	Lypd1
Niche 1	F730016J06Rik	Slc26a10
Niche 1	C030018K13Rik	Rgs14
Niche 1	C030018K13Rik	Cntnap5c
Niche 1	C030018K13Rik	Tnfrsf25
Niche 1	4930447M23Rik	Zp2
Niche 1	Gm46123	Gabra5
Niche 1	Gm48265	Dsp
Niche 1	4921539H07Rik	Prss23
Niche 1	Gm46123	Crym
Niche 1	Gm34567	Ddn
Niche 1	C030018K13Rik	Syt10
Niche 1	4921539H07Rik	Rapgefl1
Niche 1	Gm12339	Sertm1
Niche 1	ENSMUSG00000120597	Gabra5
Niche 1	Gm48265	Ctxnd1
Niche 1	4921539H07Rik	Dgat2
Niche 1	Zfas1	Ctxnd1
Niche 1	C030018K13Rik	Ddn
Niche 1	C030018K13Rik	Dock4
Niche 1	Gm34567	Zfp189
Niche 1	Gm12339	Sh3bp5
Niche 1	Gm34567	Sphkap
Niche 1	Gm50284	Scn3b
Niche 1	9830166K06Rik	Bhlhe22
Niche 1	4930578M01Rik	Sowaha
Niche 1	ENSMUSG00000120597	Wipf3
Niche 1	4930477G07Rik	Ctxnd1
Niche 1	Gm44724	Ptk2b
Niche 1	Gm48265	Itpka
Niche 1	2010320O07Rik	Sowaha
Niche 1	C030018K13Rik	Kctd12
Niche 1	Gm4632	Cabp7
Niche 1	4921539H07Rik	Stpg1
Niche 1	Gm44724	Cdh9
Niche 1	9830166K06Rik	Jrk
Niche 1	Gm46123	Ccbe1
Niche 1	C030018K13Rik	Tnxb
Niche 1	C030018K13Rik	Scgb2b2
Niche 1	Gm46123	Hectd2
Niche 1	4921539H07Rik	Ippk
Niche 1	Zfas1	Cabp7
Niche 1	ENSMUSG00000120670	Gimd1
Niche 1	4921539H07Rik	Crhbp
Niche 1	Gm34567	Hunk
Niche 1	Gm47728	Crlf1
Niche 1	Gm34567	St6galnac5
Niche 1	C030018K13Rik	Nid2
Niche 1	C030018K13Rik	Slc44a5
Niche 1	Gm44257	Dsp
Niche 1	Gm12339	Dhx33
Niche 1	Gm50430	Gm19965
Niche 1	BC055402	Shisa6
Niche 1	4921539H07Rik	Palmd
Niche 1	ENSMUSG00000120597	Wfs1
Niche 1	Gm47728	Lct
Niche 1	C030018K13Rik	Nrp2
Niche 1	Gm46123	Serpina3n
Niche 1	Gm12339	Fibcd1
Niche 1	C030018K13Rik	Yipf2
Niche 1	Gm46123	Sertm1
Niche 1	Gm16263	Cpne6
Niche 1	4930578M01Rik	Smarcd2
Niche 1	Gm9947	Gm19965
Niche 1	Gm12339	Prdm8
Niche 1	Gm46123	Or13p8
Niche 1	4921539H07Rik	Cachd1
Niche 1	C030018K13Rik	Gria1
Niche 1	4921539H07Rik	Fat4
Niche 1	Gm12339	Smoc2
Niche 1	Gm34567	Rab40b
Niche 1	Gm46123	Col11a1
Niche 1	Gm34567	Raver2
Niche 1	Gm46123	Tanc1
Niche 1	C030018K13Rik	Gpr22
Niche 1	C030018K13Rik	Fkbp10
Niche 1	Gm47728	Cacna1h
Niche 1	Gm46123	Rad51
Niche 1	Gm34567	Ippk
Niche 1	4930477G07Rik	Neurod6
Niche 1	Gm48265	Rnf182
Niche 1	4921539H07Rik	Hunk
Niche 1	4921539H07Rik	Slc6a19
Niche 1	C030018K13Rik	Stpg1
Niche 1	C030018K13Rik	Vangl2
Niche 1	Gm12339	Traip
Niche 1	Gm48265	Sowaha
Niche 1	2310002F09Rik	Crym
Niche 1	Gm46123	Ube2g2
Niche 1	Gm44724	Wipf3
Niche 1	Gm44724	Zdhhc23
Niche 1	C030018K13Rik	Scnm1
Niche 1	C030018K13Rik	Thsd4
Niche 1	4930578M01Rik	Cldn34a
Niche 1	Gm50284	Limd2
Niche 1	Gm6999	Crlf1
Niche 1	2010320O07Rik	Jrk
Niche 1	Gm46123	Zdhhc23
Niche 1	Gm49678	Zp2
Niche 1	Gm47728	Doc2b
Niche 1	4921539H07Rik	Bmi1
Niche 1	Gm34567	Syt10
Niche 1	ENSMUSG00000121397	Slc26a10
Niche 1	Gm50284	Iqgap2
Niche 1	C030018K13Rik	Prkcg
Niche 1	ENSMUSG00000120597	Zbtb20
Niche 1	C030018K13Rik	Arhgap39
Niche 1	Gm35940	Crlf1
Niche 1	Gm48265	Golm1
Niche 1	Gm13417	Crym
Niche 1	ENSMUSG00000120597	Npnt
Niche 1	Gm46123	Arpc5
Niche 1	4921539H07Rik	Pip5k1b
Niche 1	Gm49172	Neurod6
Niche 1	C030018K13Rik	Dnah9
Niche 1	C030018K13Rik	2900026A02Rik
Niche 1	Gm12339	Cacna1h
Niche 1	Gm46123	Il1r1
Niche 1	Gm44724	Prdm8
Niche 1	C030018K13Rik	Pgbd5
Niche 1	Gm16263	Cyren
Niche 1	4930578M01Rik	Or13a22
Niche 1	C030018K13Rik	Suv39h2
Niche 1	Gm13417	Lpl
Niche 1	Gm46123	Lonrf3
Niche 1	Gm50284	Kctd4
Niche 1	Gm46123	Nrp1
Niche 1	C030018K13Rik	Aqp1
Niche 1	Gm49172	Gm19965
Niche 1	ENSMUSG00000120999	Gm19965
Niche 1	Gm44724	Cabp7
Niche 1	Gm12339	Trpc4
Niche 1	Gm49166	Bhlhe22
Niche 1	ENSMUSG00000120597	Itga8
Niche 1	Gm44724	Rnf182
Niche 1	Gm42744	Lct
Niche 1	Gm44724	Rasl11b
Niche 1	4921539H07Rik	Hspa2
Niche 1	Gm49678	Ctxnd1
Niche 1	C030018K13Rik	Ramp3
Niche 1	BC055402	Bhlhe22
Niche 1	ENSMUSG00000120597	Tspan18
Niche 1	Gm47728	Trpc4
Niche 1	ENSMUSG00000120670	Dsp
Niche 1	2010320O07Rik	Cd38
Niche 1	C030018K13Rik	Zbtb18
Niche 1	Gm34567	Arhgap39
Niche 1	4921539H07Rik	Camkk1
Niche 1	Gm12339	Plk1
Niche 1	2810455O05Rik	Cabp7
Niche 1	4921539H07Rik	Stum
Niche 1	Gm47728	Cacng8
Niche 1	1700057H15Rik	Dsp
Niche 1	ENSMUSG00000120597	Sphkap
Niche 1	ENSMUSG00000120597	Zbtb18
Niche 1	C030018K13Rik	Cracdl
Niche 1	4921539H07Rik	Itpka
Niche 1	Gm44257	Ctxnd1
Niche 1	Gm34567	Rapgefl1
Niche 1	C030018K13Rik	Rnf19a
Niche 1	Gm49166	Lct
Niche 1	Gm46123	Cecr2
Niche 1	C030018K13Rik	Ppp4r4
Niche 1	4921539H07Rik	Nrp1
Niche 1	Gm50050	Gm19965
Niche 1	C030018K13Rik	Pcdh8
Niche 1	Gm46123	Slc9a2
Niche 1	1700057H15Rik	Ctxnd1
Niche 1	Gm34567	Vangl2
Niche 1	C030018K13Rik	Asb2
Niche 1	4921539H07Rik	Zfp85
Niche 1	Gm34567	Camta2
Niche 1	Gm44724	Rab40b
Niche 1	Gm46123	Cachd1
Niche 1	Gm26652	Gimd1
Niche 1	C030018K13Rik	Dbh
Niche 1	Gm13417	Neurod2
Niche 1	4921539H07Rik	Abca16
Niche 1	C030018K13Rik	Efnb3
Niche 1	C030018K13Rik	Fam166c
Niche 1	Gm34567	Stpg1
Niche 1	Gm44724	Gpr161
Niche 1	Gm2164	Kcng2
Niche 1	4921539H07Rik	Slc9a2
Niche 1	Gm47728	Sh3bp5
Niche 1	Gm42744	Cabp7
Niche 1	Gm46123	Lpl
Niche 1	Gm12339	Cfap100
Niche 1	C030018K13Rik	Jph1
Niche 1	Gm13417	Cracdl
Niche 1	4921539H07Rik	Abcc8
Niche 1	4921539H07Rik	Otub2
Niche 1	4921539H07Rik	Mndal
Niche 1	5830408C22Rik	Pcdh20
Niche 1	Gm47728	C1ql2
Niche 1	Gm46123	Nr4a3
Niche 1	C030018K13Rik	Rab40b
Niche 1	Gm12339	Wfs1
Niche 1	4921539H07Rik	Rerg
Niche 1	Gm34567	Rfx3
Niche 1	Gm46123	Arhgap12
Niche 1	Gm34567	Lamb1
Niche 1	C030018K13Rik	Prss23
Niche 1	Gm50284	Htr1a
Niche 1	Gm34567	Zbtb18
Niche 1	2310002F09Rik	Matn2
Niche 1	4930578M01Rik	Golm1
Niche 1	Kcnd3os	Gm19965
Niche 1	ENSMUSG00000120597	Rfx3
Niche 1	Gm12339	Orai2
Niche 1	C030018K13Rik	Cd151
Niche 1	2010320O07Rik	Scn3b
Niche 1	Gm46123	Plekhg5
Niche 1	Gm50328	Cabp7
Niche 1	Gm12339	Rpusd3
Niche 1	Gm49172	Hpca
Niche 1	Gm6999	Kcng2
Niche 1	4930578M01Rik	Doc2b
Niche 1	4921539H07Rik	Rasd1
Niche 1	Gm34567	Adra1d
Niche 2	Gm20400	Mgp
Niche 2	Gm20400	Thbd
Niche 2	Gm20400	Ttr
Niche 2	Gm20400	Ecrg4
Niche 2	Gm44662	Ttr
Niche 2	Gm20400	Prg4
Niche 2	Gm20400	Fmod
Niche 2	Gm20400	Drc7
Niche 2	Gm50269	Ttr
Niche 2	Gm50269	Mgp
Niche 2	Gm44662	Thbd
Niche 2	Gm20400	Sostdc1
Niche 2	Gm41669	Ttr
Niche 2	Gm3331	Ttr
Niche 2	Gm44662	Ecrg4
Niche 2	Gm20400	Mfrp
Niche 2	Gm34868	Ttr
Niche 2	Gm6260	Thbd
Niche 2	Gm20400	Ptgds
Niche 2	Gm44662	Sostdc1
Niche 2	Gm20400	Col1a2
Niche 2	Gm15417	Ttr
Niche 2	Gm20400	Prelp
Niche 2	Nlrp1c-ps	Ttr
Niche 2	9630013A20Rik	Ecrg4
Niche 2	Gm44662	Fmod
Niche 2	9630013A20Rik	Thbd
Niche 2	A330084C13Rik	Ttr
Niche 2	Gm6260	Ecrg4
Niche 2	Gm20400	Serping1
Niche 2	9630013A20Rik	Mgp
Niche 2	Gm20400	Vamp8
Niche 2	Gm26954	Ttr
Niche 2	Gm34759	Ttr
Niche 2	Gm15983	Ttr
Niche 2	Gm6260	Mgp
Niche 2	Gm20400	Cldn2
Niche 2	AV064505	Ttr
Niche 2	Gm41793	Ttr
Niche 2	Gm20400	Mutyh
Niche 2	Gm50269	Ecrg4
Niche 2	A230087F16Rik	Ttr
Niche 2	Gm26954	Mgp
Niche 2	Gm50269	Thbd
Niche 2	Gm41669	Sostdc1
Niche 2	9230106D20Rik	Ttr
Niche 2	Gm37915	Thbd
Niche 2	Gm26703	Ttr
Niche 2	Gm41669	Mgp
Niche 2	Gm48728	Ttr
Niche 2	Gm20400	Otx2
Niche 2	ENSMUSG00000121397	Thbd
Niche 2	Gm20400	Irx2
Niche 2	9630013A20Rik	Ttr
Niche 2	5930403N24Rik	Ttr
Niche 2	Gm20400	Clic6
Niche 2	Gm20400	Eln
Niche 2	Gm2916	Ttr
Niche 2	Gm20400	Igfbp2
Niche 2	5830408C22Rik	Thbd
Niche 2	Gm20400	Aqp1
Niche 2	Gm20400	Kcnj13
Niche 2	Gm20400	Lbp
Niche 2	Gm41669	Ecrg4
Niche 2	Gm3331	Sostdc1
Niche 2	Gm50269	Sostdc1
Niche 2	Gm34759	Enpp2
Niche 2	Gm20400	Trip10
Niche 2	Gm34759	Cldn2
Niche 2	Gm20400	Cldn1
Niche 2	Gm20400	Enpp2
Niche 2	1700065O20Rik	Ttr
Niche 2	Gm20400	Lamb2
Niche 2	Gm34759	Ecrg4
Niche 2	Gm50269	Prg4
Niche 2	Gm48912	Ttr
Niche 2	5830408C22Rik	Ecrg4
Niche 2	Gm44662	Drc7
Niche 2	Gm20400	Col3a1
Niche 2	Nlrp1c-ps	Mgp
Niche 2	Gm20400	Bik
Niche 2	Gm44662	Mfrp
Niche 2	Gm34759	Thbd
Niche 2	Gm49519	Ttr
Niche 2	Gm6260	Drc7
Niche 2	Gm20400	Lrrc71
Niche 2	Gm6260	Fmod
Niche 2	Gm3331	Ecrg4
Niche 2	Gm41669	Kl
Niche 2	Neat1	Ecrg4
Niche 2	Gm20400	Vim
Niche 2	Gm20400	Ace
Niche 2	Gm34868	Enpp2
Niche 2	Gm13373	Ttr
Niche 2	9630013A20Rik	Prg4
Niche 2	Gm26954	Ecrg4
Niche 2	Gm41669	Irx2
Niche 2	9630013A20Rik	Fmod
Niche 2	A330084C13Rik	Ecrg4
Niche 2	Gm20400	Kl
Niche 2	Gm15417	Sostdc1
Niche 2	Gm41669	Aqp1
Niche 2	Nlrp1c-ps	Thbd
Niche 2	Gm6260	Prg4
Niche 2	5830408C22Rik	Mgp
Niche 2	Gm41793	Mgp
Niche 2	Gm44662	Mgp
Niche 2	AV064505	Mgp
Niche 2	AV064505	Thbd
Niche 2	Gm37915	Ttr
Niche 2	Gm50269	Fmod
Niche 2	Gm26954	Sostdc1
Niche 2	Gm20400	Slc6a13
Niche 2	Gm20400	Cdkn1c
Niche 2	9230106D20Rik	Mgp
Niche 2	A330084C13Rik	Mgp
Niche 2	Gm3331	Thbd
Niche 2	9230106D20Rik	Thbd
Niche 2	Gm46332	Ttr
Niche 2	Gm41669	Thbd
Niche 2	Gm6260	Ttr
Niche 2	Smc2os	Ttr
Niche 2	Gm20400	Fn1
Niche 2	9630013A20Rik	Drc7
Niche 2	Gm44662	Cldn2
Niche 2	ENSMUSG00000121397	Mgp
Niche 2	Gm41669	Fmod
Niche 2	Gm15983	Sostdc1
Niche 2	Gm20400	Slc4a2
Niche 2	F730016J06Rik	Thbd
Niche 2	Gm44662	Prg4
Niche 2	Gm48728	Mgp
Niche 2	Gm26954	Irx2
Niche 2	A330084C13Rik	Sostdc1
Niche 2	Gm44662	Irx2
Niche 2	Gm44662	Vamp8
Niche 2	9630013A20Rik	Sostdc1
Niche 2	Gm44662	Aqp1
Niche 2	Gm20400	Ly6c1
Niche 2	F730016J06Rik	Ecrg4
Niche 2	Gm20400	Vcam1
Niche 2	Gm13373	Ecrg4
Niche 2	3300005D01Rik	Mgp
Niche 2	Gm20400	Spp1
Niche 2	Gm20400	Cavin1
Niche 2	Gm20400	Col1a1
Niche 2	Gm14167	Ttr
Niche 2	Gm49774	Ttr
Niche 2	Gm39185	Ttr
Niche 2	Gm35240	Ttr
Niche 2	Gm6260	Mfrp
Niche 2	Gm20400	Lsm2
Niche 2	Gm20400	Tmem72
Niche 2	D130079A08Rik	Ttr
Niche 2	Gm20400	Ahnak
Niche 2	Nlrp1c-ps	Sostdc1
Niche 2	Gm37915	Cldn2
Niche 2	Neat1	Mgp
Niche 2	ENSMUSG00000120735	Ttr
Niche 2	Gm15983	Thbd
Niche 2	Gm41669	Kcne2
Niche 2	Gm20400	Bnc2
Niche 2	Gm41669	Drc7
Niche 2	3300005D01Rik	Ecrg4
Niche 2	5430431A17Rik	Ttr
Niche 2	Gm20400	Rbp1
Niche 2	Gm20400	Mns1
Niche 2	3300005D01Rik	Sostdc1
Niche 2	Gm15417	Mgp
Niche 2	Tnfsf13os	Ttr
Niche 2	ENSMUSG00000121397	Ttr
Niche 2	A330084C13Rik	Thbd
Niche 2	Gm14317	Ttr
Niche 2	Gm44662	Ptgds
Niche 2	Gm48607	Ttr
Niche 2	Gm44662	Col1a2
Niche 2	Gm20400	Slc6a20a
Niche 2	Gm34868	Mgp
Niche 2	Gm50269	Drc7
Niche 2	Gm41793	Sostdc1
Niche 2	3110083C13Rik	Ttr
Niche 2	Gm48912	Mgp
Niche 2	3300005D01Rik	Ttr
Niche 2	Gm44662	Kl
Niche 2	Gm44662	Mutyh
Niche 2	8430436N08Rik	Ttr
Niche 2	AV064505	Ecrg4
Niche 2	Neat1	Thbd
Niche 2	Gm34868	Sostdc1
Niche 2	D130079A08Rik	Ecrg4
Niche 2	Gm6260	Sostdc1
Niche 2	Gm26954	Thbd
Niche 2	Gm20400	Kctd12b
Niche 2	Gm20400	Slc13a4
Niche 2	Gm3331	Mgp
Niche 2	Gm29538	Ttr
Niche 2	Gm3331	Fmod
Niche 2	Gm41793	Thbd
Niche 2	9630013A20Rik	Mfrp
Niche 2	A330049N07Rik	Ttr
Niche 2	Nlrp1c-ps	Fmod
Niche 2	3300005D01Rik	Thbd
Niche 2	Gm50269	Ptgds
Niche 2	Gm2916	Sostdc1
Niche 2	Gm26703	Sostdc1
Niche 2	5930403N24Rik	Thbd
Niche 2	Gm44662	Cldn1
Niche 2	D130079A08Rik	Thbd
Niche 2	Gm26954	Aqp1
Niche 2	AV064505	Sostdc1
Niche 2	Gm13373	Thbd
Niche 2	Gm20400	C4b
Niche 2	Gm34759	Sostdc1
Niche 2	AV064505	Fmod
Niche 2	Gm26954	Fmod
Niche 2	Gm41669	Mutyh
Niche 2	Gm49878	Ttr
Niche 2	Gm20400	Lrrc23
Niche 2	Gm34868	Prg4
Niche 2	Gm6260	Vamp8
Niche 2	Gm49539	Ttr
Niche 2	Gm26703	Thbd
Niche 2	A230087F16Rik	Sostdc1
Niche 2	4921515G04Rik	Ttr
Niche 2	Neat1	Sostdc1
Niche 2	Gm50269	Col1a2
Niche 2	Gm20400	Serpinb1b
Niche 2	9230106D20Rik	Prg4
Niche 2	Gm41669	Vim
Niche 2	Gm6260	Mutyh
Niche 2	5830408C22Rik	Cldn2
Niche 2	Gm44662	Prelp
Niche 2	9230106D20Rik	Ecrg4
Niche 2	Gm20400	Fam161a
Niche 2	Gm20400	Txnip
Niche 2	A330084C13Rik	Fmod
Niche 2	Gm37915	Mfrp
Niche 2	D130079A08Rik	Sostdc1
Niche 2	Gm20400	Flnc
Niche 2	Gm44662	Otx2
Niche 2	Gm12130	Ttr
Niche 2	Gm37915	Enpp2
Niche 2	Gm37915	Ecrg4
Niche 2	Gm20400	Car13
Niche 2	Gm20400	Thbs1
Niche 2	Gm26703	Ecrg4
Niche 2	Gm44812	Ttr
Niche 2	Gm48728	Sostdc1
Niche 2	ENSMUSG00000120568	Ttr
Niche 2	Gm6260	Prelp
Niche 2	Gm15956	Enpp2
Niche 2	Gm20400	St6galnac2
Niche 2	Gm26954	Drc7
Niche 2	5830408C22Rik	Ttr
Niche 2	2310010J17Rik	Ttr
Niche 2	9630013A20Rik	Prelp
Niche 2	Gm13373	Mgp
Niche 2	F730016J06Rik	Mgp
Niche 2	Gm20400	Plekhs1
Niche 2	8430436N08Rik	Mgp
Niche 2	Gm15983	Fmod
Niche 2	Gm31323	Ttr
Niche 2	A230087F16Rik	Ecrg4
Niche 2	Gm37915	Fmod
Niche 2	F730016J06Rik	Ttr
Niche 2	Nlrp1c-ps	Ecrg4
Niche 2	Gm36719	Ttr
Niche 2	Gm15956	Ttr
Niche 2	9630013A20Rik	Vamp8
Niche 2	Gm15983	Ecrg4
Niche 2	Gm50269	Prelp
Niche 2	Gm50269	Serping1
Niche 2	Gm26954	Mutyh
Niche 2	Gm20400	Bmp6
Niche 2	Gm13417	Thbd
Niche 2	5830408C22Rik	Prg4
Niche 2	9630013A20Rik	Col1a2
Niche 2	D130079A08Rik	Mgp
Niche 2	Nlrp1c-ps	Prg4
Niche 2	Gm49519	Irx2
Niche 2	ENSMUSG00000121397	Drc7
Niche 2	Gm15417	Thbd
Niche 2	Gm6260	Cldn2
Niche 2	Gm34868	Thbd
Niche 2	Gm49519	Ecrg4
Niche 2	Gm20400	Crb2
Niche 2	A330049N07Rik	Thbd
Niche 2	1700065O20Rik	Sostdc1
Niche 2	Gm41669	Prg4
Niche 2	Gm41669	Pcolce
Niche 2	A330049N07Rik	Mgp
Niche 2	3300005D01Rik	Fmod
Niche 2	AV064505	Drc7
Niche 2	5830408C22Rik	Kcnj13
Niche 2	Gm6260	Col1a2
Niche 2	ENSMUSG00000121127	Ttr
Niche 2	Gm20400	Cgnl1
Niche 2	Gm26954	Kl
Niche 2	Gm41793	Fmod
Niche 2	Gm44662	Lbp
Niche 2	Gm50269	Mfrp
Niche 2	Gm2916	Thbd
Niche 2	Nlrp1c-ps	Drc7
Niche 2	Gm48912	Sostdc1
Niche 2	Gm41669	Lbp
Niche 2	Gm44662	Slc4a2
Niche 2	Gm44662	Vim
Niche 2	Gm13373	Enpp2
Niche 2	ENSMUSG00000121397	Ecrg4
Niche 2	Gm20400	Ech1
Niche 2	Gm26684	Ttr
Niche 2	AV099323	Ttr
Niche 2	9230106D20Rik	Sostdc1
Niche 2	Gm49087	Ttr
Niche 2	5930403N24Rik	Ecrg4
Niche 2	Gm44662	Enpp2
Niche 2	A330084C13Rik	Drc7
Niche 2	Gm49519	Sostdc1
Niche 2	Gm50269	Lbp
Niche 2	ENSMUSG00000121397	Prg4
Niche 2	Gm20400	Vmn2r52
Niche 2	A330049N07Rik	Sostdc1
Niche 2	AV064505	Prg4
Niche 2	A330084C13Rik	Irx2
Niche 2	Gm39185	Mgp
Niche 2	Gm26703	Fmod
Niche 2	Gm26954	Vim
Niche 2	Gm20400	Foxj1
Niche 2	Gm20400	Ogg1
Niche 2	Gm34759	Mfrp
Niche 2	Gm47163	Ttr
Niche 2	Gm44662	Igfbp2
Niche 2	Gm48912	Ecrg4
Niche 2	Gm20400	Ninj1
Niche 2	Gm20400	Adgrg5
Niche 2	9630013A20Rik	Cldn2
Niche 2	Gm13373	Prg4
Niche 2	Gm2916	Fmod
Niche 2	Gm3331	Kl
Niche 2	Gm41669	Prelp
Niche 2	Gm20400	F5
Niche 2	Gm20400	Susd2
Niche 2	Gm44662	Ace
Niche 2	Gm26788	Ttr
Niche 2	Gm20400	Tmem238
Niche 2	Gm44662	Clic6
Niche 2	Gm2916	Ecrg4
Niche 2	9630013A20Rik	Mutyh
Niche 2	Gm20400	Kcne2
Niche 2	Gm48265	Thbd
Niche 2	Gm43584	Ttr
Niche 2	Gm20400	Pcolce
Niche 2	Gm20400	Adh1
Niche 2	5930403N24Rik	Sostdc1
Niche 2	Gm20400	Gfap
Niche 2	5830408C22Rik	Mfrp
Niche 2	Neat1	Fmod
Niche 2	Gm29478	Ttr
Niche 2	Gm13373	Cldn2
Niche 2	Gm20400	1700003H04Rik
Niche 2	5830408C22Rik	Enpp2
Niche 2	Gm44662	Tmem72
Niche 2	Gm31323	Thbd
Niche 2	Gm44662	Mns1
Niche 2	9630013A20Rik	Ptgds
Niche 2	Gm44662	Slc13a4
Niche 2	Gm20400	Tmco5b
Niche 2	Gm34868	Cldn2
Niche 2	Gm12130	Ecrg4
Niche 2	9630013A20Rik	Cldn1
Niche 2	Gm28643	Mgp
Niche 2	Gm29478	Thbd
Niche 2	Gm14546	Ttr
Niche 2	Gm29478	Mgp
Niche 2	Gm15983	Mgp
Niche 2	Gm50269	Vamp8
Niche 2	Tnfsf13os	Ecrg4
Niche 2	ENSMUSG00000121397	Fmod
Niche 2	Gm6260	Serping1
Niche 2	Gm50269	Otx2
Niche 2	Gm12022	Ttr
Niche 2	Gm20400	Sla
Niche 2	Gm41669	Sncg
Niche 2	9630013A20Rik	Serping1
Niche 2	Gm50269	Kl
Niche 2	Gm46404	Ttr
Niche 2	Gm34759	Fmod
Niche 2	Gm6260	Cldn1
Niche 2	Gm6260	Irx2
Niche 2	Gm20400	Fam166c
Niche 2	Gm15417	Prg4
Niche 2	Gm41669	Col1a2
Niche 2	Gm3331	Prg4
Niche 2	Gm4890	Ttr
Niche 2	Gm26954	Prg4
Niche 2	A230087F16Rik	Thbd
Niche 2	5830408C22Rik	Vamp8
Niche 2	Gm26954	Trip10
Niche 2	Gm20400	Pltp
Niche 2	9530026P05Rik	Mgp
Niche 2	9630013A20Rik	Otx2
Niche 2	Gm6260	Eln
Niche 2	ENSMUSG00000121397	Mfrp
Niche 2	Gm41669	Trip10
Niche 2	D130079A08Rik	Prg4
Niche 2	Gm20400	Aldh1a2
Niche 2	Gm3331	Drc7
Niche 2	Gm34759	Mgp
Niche 2	Gm20400	Cd63
Niche 2	Gm20400	Sec16b
Niche 2	Gm34759	Prg4
Niche 2	Gm49539	Thbd
Niche 2	Gm20400	Cdh3
Niche 2	Gm31323	Ecrg4
Niche 2	Gm31323	Mgp
Niche 2	Gm35240	Enpp2
Niche 2	Gm41793	Drc7
Niche 2	A330084C13Rik	Aqp1
Niche 2	Gm20400	Gm35549
Niche 2	Neat1	Prg4
Niche 2	3300005D01Rik	Drc7
Niche 2	Gm20400	Fzd4
Niche 2	A330049N07Rik	Ecrg4
Niche 2	Gm34759	Vamp8
Niche 2	Gm20400	Gas1
Niche 2	9630013A20Rik	Irx2
Niche 2	Gm20400	Aqp4
Niche 2	Gm14167	Ecrg4
Niche 2	2500002B13Rik	Ttr
Niche 2	Gm20400	Col8a1
Niche 2	Gm44662	Kcnj13
Niche 2	F730016J06Rik	Prg4
Niche 2	4930557K07Rik	Ttr
Niche 2	Gm20400	Tmem176a
Niche 2	Gm49519	Mgp
Niche 2	Gm41793	Prg4
Niche 2	Gm37915	Drc7
Niche 2	A330084C13Rik	Prg4
Niche 2	ENSMUSG00000121127	Mgp
Niche 2	Gm44662	Kcne2
Niche 2	Gm35240	Sostdc1
Niche 2	AU017674	Ttr
Niche 2	5930403N24Rik	Mgp
Niche 2	Gm26954	Prelp
Niche 2	Gm34868	Ecrg4
Niche 2	Gm20400	Igfbp5
Niche 2	A430035B10Rik	Ttr
Niche 2	1700065O20Rik	Thbd
Niche 2	Gm6260	Otx2
Niche 2	Gm41669	Calml4
Niche 2	Gm6260	Kcnj13
Niche 2	Gm20400	A2m
Niche 2	F730016J06Rik	Cldn2
Niche 2	Gm28836	Ttr
Niche 2	A330084C13Rik	Kl
Niche 2	Gm14546	Mgp
Niche 2	9530026P05Rik	Ecrg4
Niche 2	9230106D20Rik	Fmod
Niche 2	Gm20400	Elovl7
Niche 2	Prox1os	Ttr
Niche 2	1700065O20Rik	Ecrg4
Niche 2	Gm20400	Myh11
Niche 2	A330084C13Rik	Mutyh
Niche 2	Gm41793	Ecrg4
Niche 2	Nlrp1c-ps	Ptgds
Niche 2	Gm15983	Drc7
Niche 2	Gm6260	Igfbp2
Niche 2	Gm44662	Vcam1
Niche 2	Gm6260	Ptgds
Niche 2	Gm46332	Sostdc1
Niche 2	3300005D01Rik	Prg4
Niche 2	ENSMUSG00000119980	Ttr
Niche 2	Gm20400	Gmnc
Niche 2	Gm44662	Lamb2
Niche 2	Gm41669	Ptgds
Niche 2	Gm20400	Rsph1
Niche 2	9630013A20Rik	Igfbp2
Niche 2	Gm20400	Mdfic
Niche 2	Gm41669	Otx2
Niche 2	Gm20400	Cstad
Niche 2	Gm50269	Cldn2
Niche 2	D330023K18Rik	Ttr
Niche 2	B930018H19Rik	Mgp
Niche 2	Gm26954	Lbp
Niche 2	1700065O20Rik	Fmod
Niche 2	Gm534	Ttr
Niche 2	Gm14167	Mgp
Niche 2	Gm44662	Thbs1
Niche 2	A430035B10Rik	Mgp
Niche 2	Gm50269	Aqp1
Niche 2	Gm6260	Col3a1
Niche 2	9630013A20Rik	Kcnj13
Niche 2	9630013A20Rik	Eln
Niche 2	Gm39185	Ecrg4
Niche 2	9630013A20Rik	Col3a1
Niche 2	Gm14317	Sostdc1
Niche 2	Gm50269	Clic6
Niche 2	Gm48728	Thbd
Niche 2	AV099323	Mgp
Niche 2	A330049N07Rik	Fmod
Niche 2	9630013A20Rik	Aqp1
Niche 2	Gm6260	Aqp1
Niche 2	Gm44662	Eln
Niche 2	9230106D20Rik	Cldn2
Niche 2	ENSMUSG00000120568	Mgp
Niche 2	8430436N08Rik	Ecrg4
Niche 2	Gm50269	Lamb2
Niche 2	Gm50269	Cldn1
Niche 2	Sfta3-ps	Ttr
Niche 2	Gm20400	Col5a3
Niche 2	Gm6260	Slc4a2
Niche 2	Nlrp1c-ps	Col1a2
Niche 2	Gm50269	Irx2
Niche 2	Gm41669	Msx1
Niche 2	Gm49519	Thbd
Niche 2	Gm26703	Mgp
Niche 2	9630013A20Rik	Lbp
Niche 2	Gm50269	Igfbp2
Niche 2	9630013A20Rik	Clic6
Niche 2	Gm20400	Vwa5a
Niche 2	AV064505	Ptgds
Niche 2	Gm50269	Mutyh
Niche 2	9230106D20Rik	Enpp2
Niche 2	Gm26788	Thbd
Niche 2	Gm3331	Ptgds
Niche 2	Gm49519	Aqp1
Niche 2	Gm6260	Clic6
Niche 2	Gm14167	Thbd
Niche 2	Gm14546	Ecrg4
Niche 2	Gm20400	Or8g28
Niche 2	Gm44662	Lrrc71
Niche 2	Gm49087	Mgp
Niche 2	9230106D20Rik	Ptgds
Niche 2	Gm44662	Col3a1
Niche 2	Gm41669	Foxj1
Niche 2	ENSMUSG00000119984	Ttr
Niche 2	Gm2916	Aqp1
Niche 2	Gm26954	Col1a2
Niche 2	Gm41669	Tmem72
Niche 2	Prox1os	Thbd
Niche 2	Gm20400	Nxn
Niche 2	9630013A20Rik	Lamb2
Niche 2	Gm6260	Trip10
Niche 2	Gm39185	Sostdc1
Niche 2	Gm49519	Fmod
Niche 2	Gm37915	Sostdc1
Niche 2	Tnfsf13os	Thbd
Niche 2	Gm20400	Fkbp9
Niche 2	Gm49774	Ecrg4
Niche 2	Gm29478	Sostdc1
Niche 2	Gm3331	Col1a2
Niche 2	Gm41669	Col3a1
Niche 2	ENSMUSG00000121397	Cldn2
Niche 2	AV064505	Col1a2
Niche 2	Gm49774	Sostdc1
Niche 2	A230087F16Rik	Mgp
Niche 2	A330084C13Rik	Prelp
Niche 2	Smc2os	Sostdc1
Niche 2	Tnfsf13os	Mgp
Niche 2	Gm20400	Perp
Niche 2	Gm2916	Irx2
Niche 2	Gm20400	Gm13889
Niche 2	9230106D20Rik	Mfrp
Niche 2	ENSMUSG00000121092	Ttr
Niche 2	Gm41669	Slc13a4
Niche 2	AU017674	Thbd
Niche 2	4921515G04Rik	Thbd
Niche 2	Gm44662	Pcolce
Niche 2	Gm28643	Ttr
Niche 2	Gm34759	Ptgds
Niche 2	Lhx1os	Ttr
Niche 2	9530026P05Rik	Thbd
Niche 2	Gm41669	Or8g28
Niche 2	5930403N24Rik	Prg4
Niche 2	Gm50269	Col3a1
Niche 2	D130079A08Rik	Fmod
Niche 2	Gm20400	Ezr
Niche 2	Gm44662	Slc6a13
Niche 2	Gm15983	Kl
Niche 2	Gm6260	Kctd12b
Niche 2	Gm20400	Irgm2
Niche 2	Gm34809	Mgp
Niche 2	Neat1	Drc7
Niche 2	Gm3331	Aqp1
Niche 2	F730016J06Rik	Mfrp
Niche 2	Gm20400	Tdh
Niche 2	Gm37915	Vamp8
Niche 2	Gm48265	Mgp
Niche 2	5930403N24Rik	Fmod
Niche 2	Gm3331	Lbp
Niche 2	Gm15983	Prg4
Niche 2	Gm6260	Lamb2
Niche 2	Gm20400	Scgb2b2
Niche 2	A330084C13Rik	Col1a2
Niche 2	Gm29371	Ttr
Niche 2	ENSMUSG00000120735	Enpp2
Niche 2	Gm20400	Foxr2
Niche 2	Gm20400	Ifi27
Niche 2	Gm26954	Col3a1
Niche 2	4930480K15Rik	Ttr
Niche 2	3300005D01Rik	Aqp1
Niche 2	Gm15417	Fmod
Niche 2	ENSMUSG00000120568	Thbd
Niche 2	5830408C22Rik	Fmod
Niche 2	Gm26703	Drc7
Niche 2	A330084C13Rik	Vim
Niche 2	Gm26788	Ecrg4
Niche 2	5830408C22Rik	Drc7
Niche 2	Gm13417	Mgp
Niche 2	Gm35110	Ttr
Niche 2	Nlrp1c-ps	Mfrp
Niche 2	Gm13373	Sostdc1
Niche 2	Gm3331	Irx2
Niche 2	Gm48265	Ecrg4
Niche 2	Gm20400	Psme2
Niche 2	Gm4793	Ttr
Niche 2	Tnfsf13os	Sostdc1
Niche 2	B930018H19Rik	Ttr
Niche 2	A330049N07Rik	Prg4
Niche 2	Gm6260	Lrrc71
Niche 2	Gm44662	Col1a1
Niche 2	Gm15983	Aqp1
Niche 2	Gm20400	Myo7a
Niche 2	Gm48912	Thbd
Niche 2	Gm14546	Thbd
Niche 2	Neat1	Ttr
Niche 2	Gm34759	Cldn1
Niche 2	Gm13373	Kcnj13
Niche 2	A330084C13Rik	Ptgds
Niche 2	Gm20400	Msx1
Niche 2	Gm44662	Ahnak
Niche 2	Gm20400	Dpp7
Niche 2	Gm50269	Kcnj13
Niche 2	AV064505	Prelp
Niche 2	Gm20400	Clec18a
Niche 2	Gm20400	Cdc14a
Niche 2	Gm20400	Aebp1
Niche 2	Gm26684	Mgp
Niche 2	Gm48607	Sostdc1
Niche 2	ENSMUSG00000120735	Ecrg4
Niche 2	Gm3331	Prelp
Niche 2	Gm6260	Bik
Niche 2	9630013A20Rik	Trip10
Niche 2	Gm31816	Thbd
Niche 2	Gm20400	Htr2c
Niche 2	3300005D01Rik	Irx2
Niche 2	Gm14167	Sostdc1
Niche 2	Gm50431	Thbd
Niche 2	Gm20400	Or51e1
Niche 2	Gm21847	Ecrg4
Niche 2	AV064505	Mfrp
Niche 2	9630013A20Rik	Slc4a2
Niche 2	Gm3331	Mfrp
Niche 2	BC037032	Ttr
Niche 2	F730016J06Rik	Enpp2
Niche 2	Gm41505	Ttr
Niche 2	Gm6260	Lbp
Niche 2	Gm41669	Aebp1
Niche 2	A330084C13Rik	Lbp
Niche 2	Gm48912	Kl
Niche 2	Gm46332	Mgp
Niche 2	Gm20400	Myh6
Niche 2	Gm6260	Cdkn1c
Niche 2	Gm20400	Nfam1
Niche 2	Gm34759	Kcnj13
Niche 2	Gm50269	Eln
Niche 2	Gm26954	Otx2
Niche 2	Gm12147	Mgp
Niche 2	Gm46652	Ttr
Niche 2	Gm45341	Ttr
Niche 2	Gm29478	Ecrg4
Niche 2	Nlrp1c-ps	Prelp
Niche 2	Gm20400	Necap2
Niche 2	1700065O20Rik	Aqp1
Niche 2	Gm46332	Thbd
Niche 2	Gm50269	Ace
Niche 2	Gm48728	Prg4
Niche 2	Gm10373	Ttr
Niche 2	Gm50269	Enpp2
Niche 2	Gm3331	Otx2
Niche 2	9630013A20Rik	Vim
Niche 2	9630013A20Rik	Bik
Niche 2	AV064505	Mutyh
Niche 2	Otx2os1	Mgp
Niche 2	Gm12130	Thbd
Niche 2	Gm6260	Vim
Niche 2	Gm26954	Kcne2
Niche 2	Gm26954	Ptgds
Niche 2	Gm26954	Kctd12b
Niche 2	F730016J06Rik	Vamp8
Niche 2	8430436N08Rik	Sostdc1
Niche 2	AV064505	Aqp1
Niche 2	Prox1os	Mgp
Niche 2	ENSMUSG00000121397	Ptgds
Niche 2	Gm20400	Endog
Niche 2	Gm20400	Gask1a
Niche 2	3110083C13Rik	Mgp
Niche 2	Gm44662	Txnip
Niche 2	Gm15417	Kl
Niche 2	Gm50269	Vim
Niche 2	Gm41669	Cldn1
Niche 2	Gm44724	Thbd
Niche 2	Gm50269	Ly6c1
Niche 2	Gm41793	Kl
Niche 2	Gm41669	Oxgr1
Niche 2	Gm12130	Mgp
Niche 2	Gm41669	Serping1
Niche 2	9630013A20Rik	Lrrc71
Niche 2	Nlrp1c-ps	Aqp1
Niche 2	Gm2916	Drc7
Niche 2	Gm49519	Mutyh
Niche 2	Nlrp1c-ps	Kl
Niche 2	Gm50269	Tmem72
Niche 2	Gm20400	Sncg
Niche 2	Gm41505	Thbd
Niche 2	Gm44662	Bnc2
Niche 2	Gm50269	Trip10
Niche 2	Gm49519	Drc7
Niche 2	D130009I18Rik	Mgp
Niche 2	3300005D01Rik	Kl
Niche 2	Gm50269	Bik
Niche 2	ENSMUSG00000120568	Ecrg4
Niche 2	Gm20400	Slc12a2
Niche 2	Gm37915	Mgp
Niche 2	Gm15496	Thbd
Niche 2	Gm26684	Ecrg4
Niche 2	Gm41793	Ptgds
Niche 2	Gm29538	Thbd
Niche 2	9630013A20Rik	Ace
Niche 2	Gm39185	Thbd
Niche 2	9630013A20Rik	Kl
Niche 2	Gm44662	Trip10
Niche 2	ENSMUSG00000121397	Serping1
Niche 2	Gm41793	Aqp1
Niche 2	Gm50269	Slc13a4
Niche 2	Gm29478	Prg4
Niche 2	9230106D20Rik	Col1a2
Niche 2	Otx2os1	Thbd
Niche 2	AU017674	Ecrg4
Niche 2	Gm44662	Kctd12b
Niche 2	Gm41669	Mfrp
Niche 2	Gm29538	Sostdc1
Niche 2	Gm34868	Ptgds
Niche 2	Gm47163	Thbd
Niche 2	Neat1	Mfrp
Niche 2	3300005D01Rik	Mutyh
Niche 2	A330084C13Rik	Otx2
Niche 2	ENSMUSG00000121092	Thbd
Niche 2	ENSMUSG00000121397	Enpp2
Niche 2	Gm31323	Prg4
Niche 2	3300005D01Rik	Prelp
Niche 2	A230087F16Rik	Prg4
Niche 2	Gm41793	Col1a2
Niche 2	D130079A08Rik	Cldn2
Niche 2	Gm6260	Slc6a13
Niche 2	Gm16263	Thbd
Niche 2	Gm41505	Mgp
Niche 2	Gm50269	Fn1
Niche 2	Gm49539	Fmod
Niche 2	Gm15496	Ttr
Niche 2	Gm3331	Kcne2
Niche 2	F730016J06Rik	Fmod
Niche 2	Gm49519	Kl
Niche 2	Gm6260	Ace
Niche 2	C130036L24Rik	Ttr
Niche 2	Gm26954	Serping1
Niche 2	5830408C22Rik	Serping1
Niche 2	8430436N08Rik	Irx2
Niche 2	5830408C22Rik	Ptgds
Niche 2	Gm20400	Cbfb
Niche 2	Gm48607	Thbd
Niche 2	Gm13373	Mfrp
[truncated: 4,141 more rows]

## Sheet: Supplementary Table 4
Supplementary Table 4 Sequencing of primers
Block primer	GAGAATGTGAGTGAAGATGTATGGTGANNNNNNN
TruRd2S-7N	GTGACTGGAGTTCCTTGGCACCCGAGAATTCCANNNNNNN
TruRd2S-15T	GTGACTGGAGTTCCTTGGCACCCGAGAATTCCATTTTTTTTTTTTTTT
